# Supplementary material
Source: ML conference proceedings conference paper supplement (https://openreview.net/forum?id=yVWBv0N1xC)
Supplement: supplementary_material [file attachment]

## 1 A Notation

- 2  $\mathbb{S}_i$ : Search options for  $layer_i$ .
- 3  $|\mathbb{S}_i|$ : Num of search options on  $layer_i$ .
- 4  $s_i$ : selected search option on  $layer_i$  from the set  $\mathbb{S}_i$
- 5  $o_i$ : default search option applied on  $layer_i$ ,  $o_{1..L}$  is the architecture of the baseline model.
- 6  $(s_1, s_2, \dots, s_L)$ : A model architecture that applies  $s_1$  on  $layer_1$ ,  $s_2$  on  $layer_2$ , ...,  $s_L$  on  $layer_L$
- 7  $(s_{1..i-1}, x_i, o_{i+1..L})$ : A model architecture that applies  $s_1$  on  $layer_1$ ,  $s_2$  on  $layer_2$ , ..., default search
- 8 option  $o_{i+1}$  on  $layer_{i+1}$ , ...  $o_L$  on  $layer_L$ , and search  $x_i$  on  $layer_i$ .
- 9  $\mathcal{M}_i$ : A model candidate that is searched on  $layer_i$ , it's in the form of  $(s_{1..i-1}, x_i, o_{i+1..L})$ .
- 10  $\mathbb{M}_i$ : All model candidates searching on  $layer_i$ .
- 11  $\mathbb{M}_{i,h}$ : Model candidates searching on  $layer_i$ , and are mapped to  $h \in \mathbb{H}$ .
- 12  $\varphi: \mathbb{M} \rightarrow \mathbb{H}$ : transforms a model architecture  $\mathcal{M} \in \mathbb{M}$  to a finite integer set  $\mathbb{H}$

## 13 B NASBench-101 Search Details

14 NASBench-101 defines a search space on 5 ops, each op has 3 options (conv1x1, conv3x3, maxpool  
15 3x3), and 21 potential edges to connect these ops and input, output ops. It contains 509M candidates  
16 with their number of parameters, accuracy on Cifar-10, and other information.

17 We construct the LayerNAS search space by adding a new edge for each layer. Search options in each  
18 layer are used to determine either to include a new op or connect two existing ops. By doing so, all  
19 constructed candidates can be legit, because all candidates are connected graphs. And this approach  
20 of search space construction can satisfy the assumption of LayerNAS: the best model candidate in  
21  $layer_i$  can be constructed from candidates in  $layer_{i-1}$  by adding an new edge.

22 In the experiments, Regularized Evolution (RE) sets population\_size=50, tournament\_size=10;  
23 Proximal Policy Optimization (PPO) sets train\_batch\_size=16, update\_batch\_size=8,  
24 num\_updates\_per\_feedback=10. Both RE and PPO are using MNAS as objective function:  
25  $Accuracy \times (Cost/Target)^{-0.07}$

26 In Figure 1, we observe that in earlier searching iterations LayerNAS performs slightly worse than  
27 other algorithms. This is because LayerNAS initially searches model candidates with fewer ops  
28 and edges, which intuitively perform poorly. However, after collecting enough information from  
29 early layers, LayerNAS consistently performs better. This is because LayerNAS does not rely on  
30 randomness, rather, it adds ops and edges from successful candidates in each layers, leading to  
31 continuous improvement.

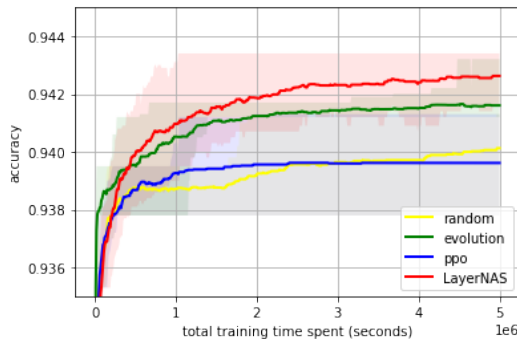

Figure 1: NASBench-101 test accuracy on Cifar-10, average on 100 runs

Table 1: Comparison on NASBench-101

| Algorithm | Validation accuracy | Test accuracy |
|-----------|---------------------|---------------|
| RS        | 0.9480              | 0.9401        |
| RE        | 0.9497              | 0.9416        |
| PPO       | 0.9476              | 0.9396        |
| LayerNAS  | <b>0.9505</b>       | <b>0.9426</b> |
| Optimal   | 0.9432              | 0.9445        |

## C NATS-Bench Search Details

In the experiments, Regularized Evolution (RE) sets `population_size=50`, `tournament_size=10`; Proximal Policy Optimization (PPO) sets `train_batch_size=16`, `update_batch_size=8`, `num_updates_per_feedback=10`. Both RE and PPO are using MNAS as objective function:  $Accuracy \times (Cost/Target)^{-0.07}$

### C.1 NATS-Bench topology search

NATS-Bench topology search defines a search space on 6 ops that connect 4 tensors, each op has 5 options (conv1x1, conv3x3, maxpool3x3, no-op, skip). In our experiments, we construct the LayerNAS search space by adding a new tensor for each layer. Search options in each layer are encoded with all op types that connect this tensor to previous tensors. So it has only 3 layers, each layer has 5, 25, 125 options. Validation and test accuracy are shown in Figure 2 and Figure 3.

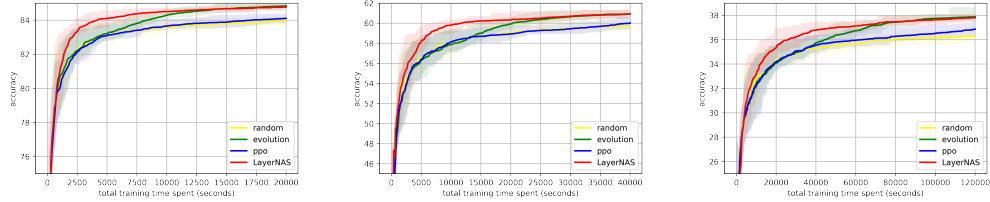

Figure 2: NATS-Bench topology search valid accuracy on (a) Cifar10 (b) Cifar100 (c) Imagenet16-120

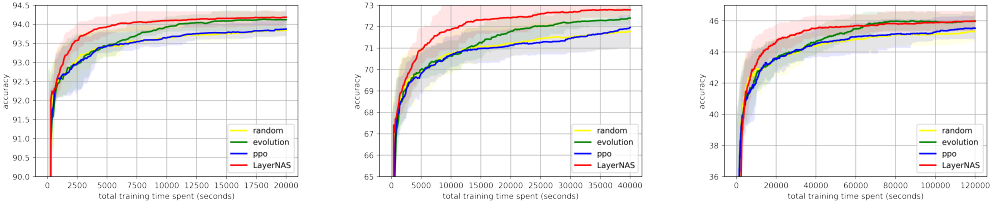

Figure 3: NATS-Bench topology search test accuracy on (a) Cifar10 (b) Cifar100 (c) Imagenet16-120

### C.2 NATS-Bench size search

NATS-Bench size search provides a dataset with information on model architectures with 5 layers. Each layer is a convolutional layer with different num of channels selected from {8, 16, 24, 32, 40, 48, 56, 64}. The model with 64 channels for all layers has the most model parameters, the largest latency and the best accuracy. The objective is to find the optimal model with 50% FLOPs.

LayerNAS constructs the search space by using the largest model as base model, and applies search options that reduce channels per layer. Althoughh LayerNAS steadily improves valid accuracy over time, test accuracy drops. This is due to in-correlation between test accuracy and valid accuracy. Validation and test accuracy are shown in Figure 4 and Figure 5. We can observe that LayerNAS can outperform other algorithms on both validation and test accuracy. We can also attribute test accuracy drop in LayerNAS to the lack of correlation with validation accuracy.

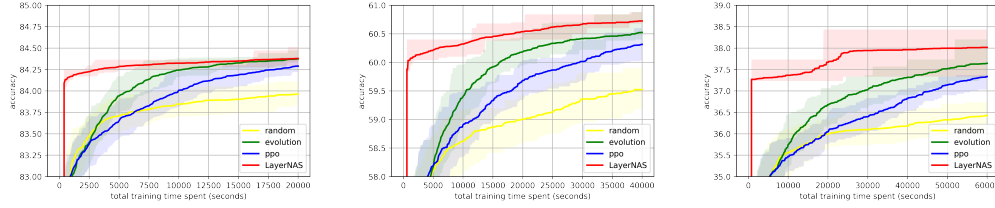

Figure 4: NATS-Bench size search valid accuracy on (a) Cifar10 (b) Cifar100 (c) Imagenet16-120

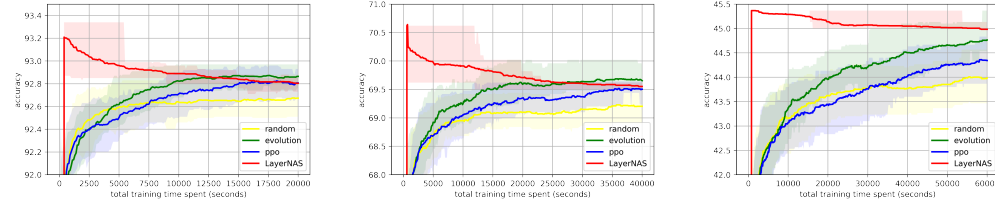

Figure 5: NATS-Bench size search test accuracy on (a) Cifar10 (b) Cifar100 (c) Imagenet16-120

## D Dynamic Programming Implementation of LayerNAS for Multi-objective NAS

Algorithm 1 demonstrates how to implement LayerNAS with Dynamic Programming, which has clear explanation why search complexity is  $O(H \cdot |\mathbb{S}| \cdot L)$ . The implementation is not used in practice because it spends most of time searching in  $layer_{1..L-1}$ , we cannot get a model in expected cost range until last layer is searched.

---

### Algorithm 1 Dynamic Programming for Combinatorial Optimization

---

```

for  $l = 1$  to  $L - 1$  do
  for  $\mathcal{M}_l \in \mathbb{M}_l$  do
    for  $s \in \mathbb{S}_{l+1}$  do
       $\mathcal{M}_{l+1} = \text{apply\_search\_option}(\mathcal{M}_l, s)$ 
       $h = \text{cost}(\mathcal{M}_{l+1})$ 
       $\text{accuracy} = \text{train\_and\_eval}(\mathcal{M}_{l+1})$ 
      if  $\text{accuracy} > \text{Accuracy}(\mathbb{M}_{l+1,h})$  then
         $\mathbb{M}_{l+1,h} = \mathcal{M}_{l+1}$ 
      end if
    end for
  end for
end for

```

---

## E Discussion on search space assumptions

Assumption 4.1 sets some characteristics of search spaces that can be leveraged to improve the search efficiency. Instead of expecting all search spaces can satisfy this assumption, in experiments, we

construct search spaces based on MobileNet to intentionally make them satisfy Assumption 4.1. While we cannot guarantee that all search spaces can be transformed to satisfy Assumption 4.1, most search spaces used in existing models or studies either implicitly use this assumption or can be transformed to satisfy it. We also demonstrate the effectiveness of this assumption from the experiments on MobileNet.

## E.1 Search space is complete

Assume we are searching for the optimal model  $s_1..s_n$ , and we store all possible model candidates on each layer. During the search process on  $layer_n$ , we generate model architectures by modifying  $o_n$  to other options in  $\mathbb{S}$ . Since we store all model architectures for  $layer_{n-1}$ , the search process can create all  $|\mathbb{S}|^n$  candidates on  $layer_n$  by adding each  $s_n \in \mathbb{S}$  to the models in  $\mathbb{M}_{n-1}$ . Therefore,  $\mathbb{M}_n$  contains all possibilities in the search space. This process can then be applied backward to the first layer.

## E.2 Sequential search order

Assume, after LayerNAS sequential search, we get optimal model defined as  $a_1..a_i..a_n$ . For sake of contradiction, there exists a model  $a_1..b_i..a_n$ , with superior performance, by applying a change in previous layers. Since the search space is complete, model  $a_1..b_i o_{i+1}..o_n$  must exist, and has been processed in  $\mathbb{M}_i$ . In the sequential search, model  $a_1..b_i a_{i+1}..o_n$  can be created by using  $a_{i+1}$  on  $layer_{i+1}$ . Repeating this process for all subsequent layers will eventually lead to  $a_1..b_i..a_n$ , contradicting our assumption that optimal model from sequential search is  $a_1..a_i..a_n$ . Therefore, we can search sequentially.

## E.3 Limit of the assumption

MobileNet architecture does not satisfy Assumption 4.1 by default. Residual requires  $layer_i$  and  $layer_j$  have the same num of filters. Suppose  $\mathbb{S}_i = \{32, 64, 96\}$ ,  $\mathbb{S}_j = \{64, 96, 128\}$ , the residual shortcut cannot be created if  $s_i = 32$ ,  $s_j = 96$ . This is the case when preceding layers are coupled with succeeding layers. To overcome this issue, we introduce a virtual layer, with options  $\{64, 96\}$ . We first search this shared filter to create residual shortcuts, and then search specs for each layer. This transformation ensures that the new search space satisfy Assumption 4.1. In the case of MobileNet search space, we first search for the common filters for the block and then for the expanded filters for each layer. This approach allows us to perform LayerNAS on a search space that satisfies Assumption 4.1.

## F Discussion on num of replicas to store

From experiments on MobileNet, we observed that multiple runs on the same model architecture can yield standard deviations of accuracy ranging from 0.08% to 0.15%. Often times, the difference can be as high as 0.3%. To address this, we propose storing multiple candidates for the same cost to increase the likelihood of keeping the better model architecture for every layer search.

Suppose we have two models with the same cost,  $x$  and  $y$ , where  $x$  is inferior and  $y$  is superior, and the training accuracy follows a Gaussian distribution  $N(\mu, \sigma^2)$ . The probability of  $x$  obtaining a higher accuracy than  $y$  is  $P(x - y > 0)$ , where  $x - y \sim N(\mu_x - \mu_y, \sigma_x^2 + \sigma_y^2)$ . In empirical examples,  $\mu_x - \mu_y = -0.002$  and  $\sigma_x = 0.001$ , then  $x$  has the probability of 9.2% of obtaining a higher accuracy. When we have  $L = 20$  layers, the probability of keeping the better model architecture for every layer search is  $(1 - p)^2 = 18\%$ .

By storing  $k$  candidates with the same cost, we can increase the probability of keeping the better model architecture. When  $k = 3$ , the probability of storing all inferior models is  $p^k = 0.08\%$ . The probability of keeping the better model architecture for all  $L = 20$  layer searches is 98.4%, which is practically good enough.

Theoretically, if we store infinite candidates per layer, we are performing a complete grid search, which guarantees a optimal model architecture.

Table 2: 60M MAdds Search Space

| Operator                 | # Output filter                                              | # Expanded Filter                                                 | strides | S  |
|--------------------------|--------------------------------------------------------------|-------------------------------------------------------------------|---------|----|
| conv2d{3x3}              | 16                                                           |                                                                   | 2       |    |
| bneck {3x3}              | {24, 20, 18, 16, 14, 12}                                     |                                                                   | 2       | 6  |
| Block filter             | {36, 32, 28, 24, 20, 18, 16}                                 |                                                                   |         | 7  |
| bneck {3x3, 5x5}         |                                                              | {144, 136, 128, 120, 112, 104, 96, 88, 80, 72, 68, 64, 60, 56}    | 2       | 28 |
| bneck {3x3, 5x5}         |                                                              | {144, 136, 128, 120, 112, 104, 96, 88, 80, 72, 68, 64, 60, 56}    | 1       | 28 |
| Block filter             | {60, 56, 52, 48, 44, 40, 36, 32, 28}                         |                                                                   |         | 9  |
| bneck {3x3, 5x5, 7x7}    |                                                              | {192, 176, 160, 144, 128, 112, 104, 96, 88, 80, 72, 64}           | 2       | 36 |
| bneck {3x3, 5x5, 7x7}    |                                                              | {480, 440, 400, 360, 320, 300, 280, 260, 240, 220, 200, 180, 160} | 1       | 39 |
| bneck {3x3, 5x5, 7x7}    |                                                              | {480, 440, 400, 360, 320, 300, 280, 260, 240, 220, 200, 180, 160} | 1       | 39 |
| Block filter             | {96, 88, 80, 72, 64, 60, 56, 52, 48, 44, 40, 36, 32}         |                                                                   |         | 13 |
| bneck {3x3, 5x5, 7x7}    |                                                              | {240, 200, 180, 160, 140, 120, 100, 90, 80}                       | 1       | 27 |
| bneck {3x3, 5x5, 7x7}    |                                                              | {288, 256, 224, 208, 192, 176, 160, 152, 144, 136, 128, 120}      | 1       | 36 |
| Block filter             | {192, 176, 160, 144, 128, 120, 112, 104, 96, 88, 80, 72, 64} |                                                                   |         | 13 |
| bneck {3x3, 5x5, 7x7}    |                                                              | {576, 544, 512, 480, 448, 416, 384, 352, 320, 288, 256, 224}      | 2       | 36 |
| bneck {3x3, 5x5, 7x7}    |                                                              | {1152, 1088, 1024, 960, 896, 832, 768, 704, 640, 576, 516, 448}   | 1       | 36 |
| bneck {3x3, 5x5, 7x7}    |                                                              | {1152, 1088, 1024, 960, 896, 832, 768, 704, 640, 576, 516, 448}   | 1       | 36 |
| conv2d 1x1<br>pool, 7x7  | {864, 576},                                                  |                                                                   |         | 2  |
| conv2d 1x1<br>conv2d 1x1 | {1536, 1024}<br>{1001}                                       |                                                                   |         | 2  |

## 111 G MobileNetV2 and MobileNetV3 Search Details

112 We aim to search models under different MAdds constraints: 60M (similar to MobileNetV3-Small),  
 113 220M (similar to MobileNetV3-Large), 300M (similar to MobileNetV2), 600M (similar to Mo-  
 114 bileNetV2 1.4x).

115 For each block, we will search the number of output filters of the block first. All layers in the block  
 116 have the same number of output filters to create residual block correctly. Following the search for the  
 117 block output filters, we search expanded filter and kernel size of each layers in this block. Strides are  
 118 fixed for all layers. We use |S| to denote the number of search options of this layer, which facilitates  
 119 the computation on the number of unique model architectures, and max number of required search  
 120 trials in LayerNAS.

### 121 G.1 60M MAdds Model

122 The search spaces has  $L = 16$  encoded length. Number of unique model architecture is  $\prod |S| =$   
 123  $5.0e + 20$ . We store up to 300 model candidates per layer, so max number of trials is  $300 \times \sum |S| =$   
 124  $1.2e + 5$ .

Table 3: LayerNAS Model under 60M MAdds

| Input                      | Operator   | # Output filter | # Expanded Filter | strides |
|----------------------------|------------|-----------------|-------------------|---------|
| $224 \times 224 \times 3$  | conv2d 3x3 | 16              |                   | 2       |
| $112 \times 112 \times 16$ | bneck 3x3  | 16              |                   | 2       |
| $56 \times 56 \times 16$   | bneck 3x3  | 28              | 144               | 2       |
| $28 \times 28 \times 28$   | bneck 3x3  | 28              | 128               | 1       |
| $28 \times 28 \times 28$   | bneck 5x5  | 44              | 96                | 2       |
| $14 \times 14 \times 44$   | bneck 3x3  | 44              | 220               | 1       |
| $14 \times 14 \times 44$   | bneck 3x3  | 44              | 200               | 1       |
| $14 \times 14 \times 44$   | bneck 7x7  | 40              | 160               | 1       |
| $14 \times 14 \times 40$   | bneck 3x3  | 40              | 152               | 1       |
| $14 \times 14 \times 96$   | bneck 5x5  | 96              | 224               | 2       |
| $7 \times 7 \times 96$     | bneck 3x3  | 96              | 448               | 1       |
| $7 \times 7 \times 96$     | bneck 3x3  | 96              | 512               | 1       |
| $7 \times 7 \times 96$     | conv2d 1x1 | 864             |                   | 1       |
| $7 \times 7 \times 864$    | pool, 7x7  |                 |                   | 1       |
| $7 \times 7 \times 864$    | conv2d 1x1 | 1536            |                   | 1       |
| $7 \times 7 \times 1536$   | conv2d 1x1 | 1001            |                   | 1       |

## 125 G.2 220M MAdds Model

126 The search spaces has  $L = 21$  encoded length, the number of unique model architecture is  $\prod |\mathbb{S}| =$   
127  $4.8e + 26$  For LayerNAS, we store up to 300 model candidates per layer, so max number of trials is  
128  $300 \times \sum |\mathbb{S}| = 1.5e + 5$

## 129 G.3 300M MAdds Model

130 The search spaces has  $L = 26$  encoded length, the number of unique model architectures is  $\prod |\mathbb{S}| =$   
131  $5.3e + 30$ . We store up to 300 model candidates per layer, so max number of trials is  $300 \times \sum |\mathbb{S}| =$   
132  $1.4e + 5$ .

## 133 G.4 600M MAdds Model

134 The search spaces has  $L = 31$  encoded length, the number of unique model architecture is  $\prod |\mathbb{S}| =$   
135  $1.6e + 39$  For LayerNAS, we store up to 300 model candidates per layer, so max number of trials is  
136  $300 \times \sum |\mathbb{S}| = 2.0e + 6$

Table 4: 220M MAdds Search Space

| Operator              | # Output filter                                  | # Expanded Filter                                                 | strides | S  |
|-----------------------|--------------------------------------------------|-------------------------------------------------------------------|---------|----|
| Conv2d{3x3}           | 16                                               |                                                                   | 2       |    |
| bneck {3x3}           | {24, 20, 18, 16, 14, 12}                         |                                                                   | 1       | 6  |
| Block filter          | {36, 32, 28, 24, 20, 16}                         |                                                                   |         |    |
| bneck {3x3, 5x5}      |                                                  | {96, 88, 80, 72, 68, 64, 60, 56, 48}                              | 2       | 18 |
| bneck {3x3, 5x5, 7x7} |                                                  | {124, 116, 108, 100, 92, 84, 72, 68, 64, 56, 48}                  | 1       | 33 |
| Block filter          | {64, 56, 52, 48, 44, 40, 36, 32, 24}             |                                                                   |         | 9  |
| bneck {3x3, 5x5, 7x7} |                                                  | {128, 120, 112, 104, 96, 88, 80, 76, 72, 64, 56}                  | 2       | 33 |
| bneck {3x3, 5x5, 7x7} |                                                  | {240, 200, 180, 160, 140, 120, 110, 100, 80}                      | 1       | 27 |
| bneck {3x3, 5x5, 7x7} |                                                  | {240, 200, 180, 160, 140, 120, 110, 100, 80}                      | 1       | 27 |
| Block filter          | {160, 140, 130, 120, 110, 100, 80, 70, 60}       |                                                                   |         | 9  |
| bneck {3x3, 5x5, 7x7} |                                                  | {360, 320, 300, 280, 260, 240, 220, 200, 180, 160}                | 2       | 30 |
| bneck {3x3, 5x5, 7x7} |                                                  | {400, 360, 340, 320, 300, 280, 260, 240, 220, 200, 180, 160, 120} | 1       | 36 |
| bneck {3x3, 5x5, 7x7} |                                                  | {368, 336, 304, 288, 272, 256, 240, 224, 208, 184, 168, 152}      | 1       | 36 |
| bneck {3x3, 5x5, 7x7} |                                                  | {368, 336, 304, 288, 272, 256, 240, 224, 208, 184, 168, 152}      | 1       | 36 |
| Block filter          | {224, 208, 192, 176, 160, 144, 128, 112, 96, 80} |                                                                   |         | 10 |
| bneck {3x3, 5x5, 7x7} |                                                  | {960, 880, 800, 720, 640, 560, 520, 480, 440, 400, 360}           | 1       | 33 |
| bneck {3x3, 5x5, 7x7} |                                                  | {1344, 1200, 1056, 960, 888, 816, 768, 720, 624, 576, 480}        | 1       | 33 |
| Block filter          | {320, 280, 240, 220, 200, 180, 160, 120, 100 }   |                                                                   |         | 9  |
| bneck {3x3, 5x5, 7x7} |                                                  | {1344, 1200, 1056, 960, 888, 816, 768, 720, 624, 576, 480}        | 2       | 33 |
| bneck {3x3, 5x5, 7x7} |                                                  | {1920, 1760, 1600, 1440, 1280, 1120, 960, 880, 800, 720, 640}     | 1       | 33 |
| bneck {3x3, 5x5, 7x7} |                                                  | {1920, 1760, 1600, 1440, 1280, 1120, 960, 880, 800, 720, 640}     | 1       | 33 |
| bneck {3x3, 5x5, 7x7} |                                                  | {1728, 1664, 1600, 1536, 1440, 1280, 1216}                        | 1       | 7  |
| conv2d 1x1            | {960}                                            |                                                                   |         |    |
| pool, 7x7             |                                                  |                                                                   |         |    |
| conv2d 1x1            | {1440, 1280}                                     |                                                                   |         | 2  |
| conv2d 1x1            | {1001}                                           |                                                                   |         |    |

Table 5: LayerNAS Model under 220M MAdds

| Input                      | Operator   | # Output filter | # Expanded Filter | strides |
|----------------------------|------------|-----------------|-------------------|---------|
| $224 \times 224 \times 3$  | conv2d 3x3 | 16              |                   | 2       |
| $112 \times 112 \times 16$ | bneck 3x3  | 18              |                   | 1       |
| $112 \times 112 \times 16$ | bneck 3x3  | 24              | 64                | 2       |
| $56 \times 56 \times 28$   | bneck 3x3  | 24              | 48                | 1       |
| $56 \times 56 \times 28$   | bneck 5x5  | 56              | 80                | 2       |
| $28 \times 28 \times 44$   | bneck 5x5  | 56              | 200               | 1       |
| $28 \times 28 \times 44$   | bneck 5x5  | 56              | 100               | 1       |
| $28 \times 28 \times 44$   | bneck 5x5  | 80              | 400               | 2       |
| $14 \times 14 \times 40$   | bneck 3x3  | 80              | 200               | 1       |
| $14 \times 14 \times 96$   | bneck 3x3  | 80              | 272               | 1       |
| $7 \times 7 \times 96$     | bneck 3x3  | 80              | 168               | 1       |
| $14 \times 14 \times 44$   | bneck 5x5  | 112             | 440               | 1       |
| $14 \times 14 \times 40$   | bneck 5x5  | 112             | 576               | 1       |
| $14 \times 14 \times 96$   | bneck 7x7  | 160             | 624               | 2       |
| $7 \times 7 \times 96$     | bneck 5x5  | 160             | 640               | 1       |
| $7 \times 7 \times 96$     | bneck 3x3  | 160             | 640               | 1       |
| $7 \times 7 \times 96$     | conv2d 1x1 | 960             |                   | 1       |
| $7 \times 7 \times 864$    | pool, 7x7  |                 |                   | 1       |
| $7 \times 7 \times 864$    | conv2d 1x1 | 1280            |                   | 1       |
| $7 \times 7 \times 1536$   | conv2d 1x1 | 1001            |                   | 1       |



Table 6: 300M MAdds Search Space

| Operator                              | # Output filter                      | # Expanded Filter                             | strides | S  |
|---------------------------------------|--------------------------------------|-----------------------------------------------|---------|----|
| Conv2d{3x3}                           | 32                                   |                                               | 2       |    |
| bneck {3x3}                           | {24, 20, 16, 14}                     |                                               | 1       | 4  |
| Block filter                          | {48, 44, 40, 36, 32, 28, 24}         |                                               |         | 7  |
| bneck {3x3, 5x5}                      |                                      | {72, 64, 56, 52, 48, 44, 40}                  | 2       | 14 |
| bneck {3x3, 5x5}                      |                                      | {144, 128, 120, 112, 104, 96, 92, 88, 80, 76} | 1       | 20 |
| bneck {3x3, 5x5}                      |                                      | {144, 128, 120, 112, 104, 96, 92, 88, 80, 76} | 1       | 20 |
| Block filter                          | {60, 56, 52, 48, 44, 40, 36, 32}     |                                               |         | 8  |
| bneck {3x3, 5x5}                      |                                      | {144, 128, 120, 112, 104, 96, 92, 88, 80, 76} | 2       | 20 |
| bneck {3x3, 5x5, 7x7}                 |                                      | {180, 160, 140, 130, 120, 110, 100, 80}       | 1       | 24 |
| bneck {3x3, 5x5, 7x7}                 |                                      | {180, 160, 140, 130, 120, 110, 100, 80}       | 1       | 24 |
| bneck {3x3, 5x5, 7x7}                 |                                      | {180, 160, 140, 130, 120, 110, 100, 80}       | 1       | 24 |
| Block filter                          | {120, 110, 100, 90, 80, 70, 60}      |                                               |         | 7  |
| bneck {3x3, 5x5, 7x7}                 |                                      | {360, 320, 280, 260, 240, 220, 200, 180}      | 2       | 24 |
| bneck {3x3, 5x5, 7x7}                 |                                      | {360, 320, 280, 260, 240, 220, 200, 180}      | 1       | 24 |
| bneck {3x3, 5x5, 7x7}                 |                                      | {360, 320, 280, 260, 240, 220, 200, 180}      | 1       | 24 |
| Block filter                          | {144, 128, 120, 104, 96, 88, 80, 72} |                                               |         | 8  |
| bneck {3x3, 5x5, 7x7}                 |                                      | {360, 320, 280, 260, 240, 220, 200, 180}      | 1       | 24 |
| bneck {3x3, 5x5, 7x7}                 |                                      | {432, 400, 368, 336, 304, 288, 272, 256, 240} | 1       | 27 |
| bneck {3x3, 5x5, 7x7}                 |                                      | {432, 400, 368, 336, 304, 288, 272, 256, 240} | 1       | 27 |
| bneck {3x3, 5x5, 7x7}                 |                                      | {432, 400, 368, 336, 304, 288, 272, 256, 240} | 1       | 27 |
| Block filter                          | {288, 256, 224, 192, 160, 144}       |                                               |         | 6  |
| bneck {3x3, 5x5, 7x7}                 |                                      | {864, 800, 736, 672, 608, 576, 512, 448}      | 2       | 24 |
| bneck {3x3, 5x5, 7x7}                 |                                      | {864, 800, 736, 672, 608, 576, 512, 448}      | 1       | 24 |
| bneck {3x3, 5x5, 7x7}                 |                                      | {864, 800, 736, 672, 608, 576, 512, 448}      | 1       | 24 |
| bneck {3x3, 5x5, 7x7}                 |                                      | {864, 800, 736, 672, 608, 576, 512, 448}      | 1       | 24 |
| bneck {3x3, 5x5, 7x7}                 | {480, 440, 400, 360, 320, 300, 280}  | {1728, 1664, 1600, 1536, 1440, 1280, 1216}    | 1       | 7  |
| pool, 7x7<br>conv2d 1x1<br>conv2d 1x1 | {1920, 1600, 1280}<br>{1001}         |                                               |         | 3  |

Table 7: LayerNAS Model under 300M MAdds

| Input                      | Operator   | # Output filter | # Expanded Filter | strides |
|----------------------------|------------|-----------------|-------------------|---------|
| $224 \times 224 \times 3$  | conv2d 3x3 | 32              |                   | 2       |
| $112 \times 112 \times 32$ | bneck 3x3  | 24              |                   | 1       |
| $112 \times 112 \times 24$ | bneck 3x3  | 28              | 40                | 2       |
| $56 \times 56 \times 28$   | bneck 3x3  | 28              | 144               | 1       |
| $56 \times 56 \times 28$   | bneck 3x3  | 28              | 88                | 1       |
| $56 \times 56 \times 28$   | bneck 3x3  | 40              | 104               | 2       |
| $28 \times 28 \times 40$   | bneck 5x5  | 40              | 110               | 1       |
| $28 \times 28 \times 40$   | bneck 3x3  | 40              | 180               | 1       |
| $28 \times 28 \times 40$   | bneck 5x5  | 40              | 130               | 1       |
| $28 \times 28 \times 40$   | bneck 7x7  | 90              | 260               | 2       |
| $14 \times 14 \times 90$   | bneck 3x3  | 90              | 220               | 1       |
| $14 \times 14 \times 90$   | bneck 3x3  | 90              | 200               | 1       |
| $14 \times 14 \times 90$   | bneck 7x7  | 120             | 320               | 1       |
| $14 \times 14 \times 120$  | bneck 5x5  | 120             | 288               | 1       |
| $14 \times 14 \times 120$  | bneck 7x7  | 120             | 256               | 1       |
| $14 \times 14 \times 120$  | bneck 3x3  | 120             | 368               | 1       |
| $14 \times 14 \times 120$  | bneck 7x7  | 160             | 608               | 2       |
| $7 \times 7 \times 160$    | bneck 7x7  | 160             | 576               | 1       |
| $7 \times 7 \times 160$    | bneck 5x5  | 160             | 608               | 1       |
| $7 \times 7 \times 160$    | bneck 3x3  | 160             | 448               | 1       |
| $7 \times 7 \times 160$    | bneck 3x3  | 280             | 1216              | 1       |
| $7 \times 7 \times 280$    | pool, 7x7  |                 |                   | 1       |
| $7 \times 7 \times 280$    | conv2d 1x1 | 1920            |                   | 1       |
| $7 \times 7 \times 1920$   | conv2d 1x1 | 1001            |                   | 1       |

Table 8: 600M MAdds Search Space

| Operator                              | # Output filter                            | # Expanded Filter                                            | strides | S  |
|---------------------------------------|--------------------------------------------|--------------------------------------------------------------|---------|----|
| Conv2d{3x3}                           | 32                                         |                                                              | 2       |    |
| bneck {3x3}                           | {36, 32, 28, 24, 20, 16}                   |                                                              | 1       | 6  |
| Block filter                          | {56, 52, 48, 44, 40, 36, 32, 28}           |                                                              |         | 8  |
| bneck {3x3, 5x5}                      |                                            | {88, 80, 72, 64, 56, 52, 48}                                 | 2       | 14 |
| bneck {3x3, 5x5}                      |                                            | {88, 80, 72, 64, 56, 52, 48}                                 | 1       | 14 |
| bneck {3x3, 5x5}                      |                                            | {88, 80, 72, 64, 56, 52, 48}                                 | 1       | 14 |
| bneck {3x3, 5x5}                      |                                            | {88, 80, 72, 64, 56, 52, 48}                                 | 1       | 14 |
| Block filter                          | {72, 64, 60, 56, 52, 48, 44, 40}           |                                                              |         | 8  |
| bneck {3x3, 5x5}                      |                                            | {180, 160, 144, 128, 120, 112, 104, 96, 92, 88, 80}          | 2       | 22 |
| bneck {3x3, 5x5, 7x7}                 |                                            | {240, 220, 200, 180, 160, 140, 130, 120, 100}                | 1       | 27 |
| bneck {3x3, 5x5, 7x7}                 |                                            | {240, 220, 200, 180, 160, 140, 130, 120, 100}                | 1       | 27 |
| bneck {3x3, 5x5, 7x7}                 |                                            | {240, 220, 200, 180, 160, 140, 130, 120, 100}                | 1       | 27 |
| bneck {3x3, 5x5, 7x7}                 |                                            | {240, 220, 200, 180, 160, 140, 130, 120, 100}                | 1       | 27 |
| Block filter                          | {200, 180, 160, 140, 120, 100, 90, 80}     |                                                              |         | 8  |
| bneck {3x3, 5x5, 7x7}                 |                                            | {440, 400, 360, 320, 280, 260, 240, 200}                     | 2       | 24 |
| bneck {3x3, 5x5, 7x7}                 |                                            | {560, 520, 480, 440, 400, 360, 320, 280, 240}                | 1       | 27 |
| bneck {3x3, 5x5, 7x7}                 |                                            | {560, 520, 480, 440, 400, 360, 320, 280, 240}                | 1       | 27 |
| bneck {3x3, 5x5, 7x7}                 |                                            | {560, 520, 480, 440, 400, 360, 320, 280, 240}                | 1       | 27 |
| Block filter                          | {180, 160, 144, 128, 120, 104, 96, 88, 80} |                                                              |         | 9  |
| bneck {3x3, 5x5, 7x7}                 |                                            | {560, 520, 480, 440, 400, 360, 320, 280, 240}                | 1       | 27 |
| bneck {3x3, 5x5, 7x7}                 |                                            | {560, 528, 496, 464, 432, 400, 368, 336, 304, 288, 272, 256} | 1       | 36 |
| bneck {3x3, 5x5, 7x7}                 |                                            | {560, 528, 496, 464, 432, 400, 368, 336, 304, 288, 272, 256} | 1       | 36 |
| bneck {3x3, 5x5, 7x7}                 |                                            | {560, 528, 496, 464, 432, 400, 368, 336, 304, 288, 272, 256} | 1       | 36 |
| bneck {3x3, 5x5, 7x7}                 |                                            | {560, 528, 496, 464, 432, 400, 368, 336, 304, 288, 272, 256} | 1       | 36 |
| Block filter                          | {320, 288, 256, 224, 192, 160}             |                                                              |         | 6  |
| bneck {3x3, 5x5, 7x7}                 |                                            | {992, 928, 864, 800, 736, 672, 608, 576, 512}                | 2       | 27 |
| bneck {3x3, 5x5, 7x7}                 |                                            | {992, 928, 864, 800, 736, 672, 608, 576, 512}                | 1       | 27 |
| bneck {3x3, 5x5, 7x7}                 |                                            | {992, 928, 864, 800, 736, 672, 608, 576, 512}                | 1       | 27 |
| bneck {3x3, 5x5, 7x7}                 |                                            | {992, 928, 864, 800, 736, 672, 608, 576, 512}                | 1       | 27 |
| bneck {3x3, 5x5, 7x7}                 |                                            | {992, 928, 864, 800, 736, 672, 608, 576, 512}                | 1       | 27 |
| bneck {3x3, 5x5, 7x7}                 |                                            | {992, 928, 864, 800, 736, 672, 608, 576, 512}                | 1       | 27 |
| bneck {3x3, 5x5, 7x7}                 | {600, 560, 520, 480, 440, 400, 360, 320}   | {1920, 1856, 1792, 1728, 1664, 1600, 1536, 1440}             | 1       | 24 |
| pool, 7x7<br>conv2d 1x1<br>conv2d 1x1 | {2560, 2240, 1920}<br>{1001}               |                                                              |         | 3  |

Table 9: LayerNAS Model under 600M MAdds

| Input                      | Operator   | # Output filter | # Expanded Filter | strides |
|----------------------------|------------|-----------------|-------------------|---------|
| $224 \times 224 \times 3$  | conv2d 3x3 | 32              |                   | 2       |
| $112 \times 112 \times 32$ | bneck 3x3  | 36              |                   | 1       |
| $112 \times 112 \times 36$ | bneck 5x5  | 36              | 80                | 2       |
| $56 \times 56 \times 36$   | bneck 5x5  | 36              | 72                | 1       |
| $56 \times 56 \times 36$   | bneck 3x3  | 36              | 80                | 1       |
| $56 \times 56 \times 36$   | bneck 5x5  | 36              | 72                | 1       |
| $56 \times 56 \times 36$   | bneck 3x3  | 48              | 144               | 2       |
| $28 \times 28 \times 48$   | bneck 3x3  | 48              | 140               | 1       |
| $28 \times 28 \times 48$   | bneck 3x3  | 48              | 160               | 1       |
| $28 \times 28 \times 48$   | bneck 3x3  | 48              | 130               | 1       |
| $28 \times 28 \times 48$   | bneck 5x5  | 48              | 140               | 1       |
| $28 \times 28 \times 48$   | bneck 7x7  | 140             | 360               | 2       |
| $14 \times 14 \times 140$  | bneck 5x5  | 140             | 360               | 1       |
| $14 \times 14 \times 140$  | bneck 3x3  | 140             | 560               | 1       |
| $14 \times 14 \times 140$  | bneck 5x5  | 140             | 440               | 1       |
| $14 \times 14 \times 140$  | bneck 7x7  | 144             | 360               | 1       |
| $14 \times 14 \times 144$  | bneck 5x5  | 144             | 560               | 1       |
| $14 \times 14 \times 144$  | bneck 3x3  | 144             | 288               | 1       |
| $14 \times 14 \times 144$  | bneck 5x5  | 144             | 400               | 1       |
| $14 \times 14 \times 144$  | bneck 5x5  | 144             | 256               | 1       |
| $14 \times 14 \times 144$  | bneck 3x3  | 192             | 864               | 2       |
| $7 \times 7 \times 192$    | bneck 5x5  | 192             | 928               | 1       |
| $7 \times 7 \times 192$    | bneck 7x7  | 192             | 736               | 1       |
| $7 \times 7 \times 192$    | bneck 7x7  | 192             | 800               | 1       |
| $7 \times 7 \times 192$    | bneck 3x3  | 192             | 928               | 1       |
| $7 \times 7 \times 192$    | bneck 3x3  | 320             | 1440              | 1       |
| $7 \times 7 \times 320$    | pool, 7x7  |                 |                   | 1       |
| $7 \times 7 \times 320$    | conv2d 1x1 | 2560            |                   | 1       |
| $7 \times 7 \times 2560$   | conv2d 1x1 | 1001            |                   | 1       |
